# Supplementary material
Source: PubMed Central journal article supplement (PMC7210693)
Supplement: mmc1.pdf [file mmc1.pdf]

## **Supplemental Material for COVID-19 and the Renin-Angiotensin System**

*Supplemental references:*

S1- [www.proteinatlas.org](http://www.proteinatlas.org) - accessed March 20th 2020

S2- <https://clinicaltrials.gov/ct2/show/NCT04287686>- accessed March 20th 2020
